# Supplementary material for: Structural characterization of Li2(MgxZn1−x)2W2O9 for bluish-white luminescence in rare earth-free tungstate phosphors
Source: Royal Society of Chemistry journal article supplement (doi:10.1039/d4cp02359e), 2024-01-01
Supplement: d4cp02359e1.pdf [file d4cp02359e1.pdf]

## Supporting Information

### Structural characterization of $\text{Li}_2(\text{Mg}_x\text{Zn}_{1-x})_2\text{W}_2\text{O}_9$ for bluish-white luminescence in rare earth-free tungstate phosphors

Jing Xie <sup>1</sup>, Liang Li <sup>1,5</sup>, Yue Zhong <sup>1</sup>, Tao Su <sup>1</sup>, Wenming Wang <sup>1</sup>, Yan Pan <sup>2</sup>, Xiantao Wei <sup>3</sup>, Yong Li <sup>1,4\*</sup>

1. *School of Microelectronics & Data Science, Anhui University of Technology, Maanshan 243000, China*
2. *Analysis and Testing Central Facility, Anhui University of Technology, Maanshan 243000, China.*
3. *Physics Experiment Teaching Center, School of Physical Sciences, University of Science and Technology of China, Hefei 230026, China*
4. *Anhui Research Center of Generic Technology in New Display Industry, Hefei 230009, PR China*
5. *School of Physics and Optoelectronics, South China University of Technology, Guangdong 510640, China*

\*Email: yongli@ahut.edu.cn;

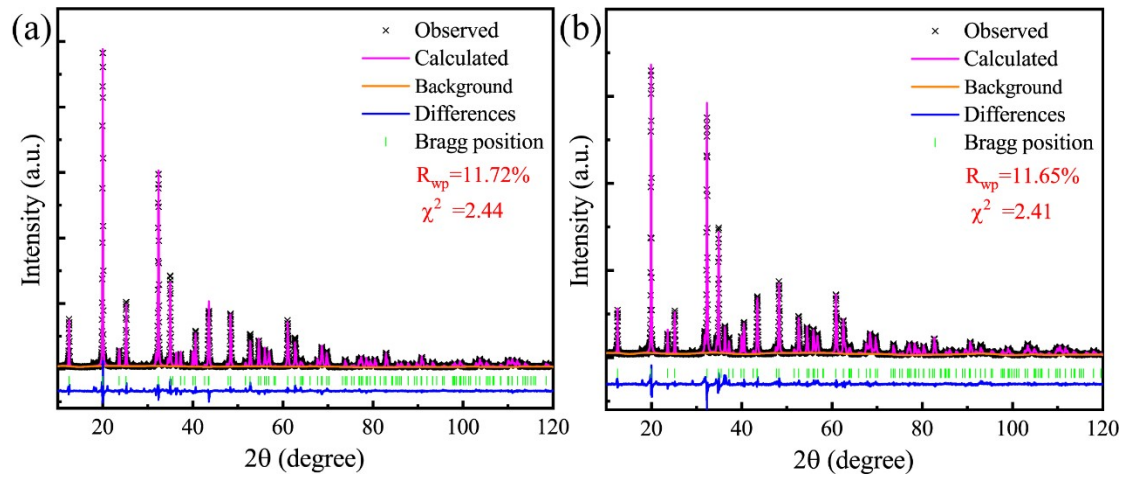

Fig. S1 (a) Rietveld refinement patterns of  $\text{Li}_2(\text{Mg}_{0.5}\text{Zn}_{0.5})_2\text{W}_2\text{O}_9$  samples. (b) Rietveld refinement patterns of  $\text{Li}_2\text{Zn}_2\text{W}_2\text{O}_9$  samples.

Fig. S1 illustrates the Rietveld refinement patterns of  $\text{Li}_2(\text{Mg}_{0.5}\text{Zn}_{0.5})_2\text{W}_2\text{O}_9$  and  $\text{Li}_2\text{Zn}_2\text{W}_2\text{O}_9$  samples. Good  $R_{\text{wp}}$  and  $\chi^2$  values were obtained from the refinements of sample XRD profiles. This indicates that the Rietveld method is successfully used to modify the crystal structures.

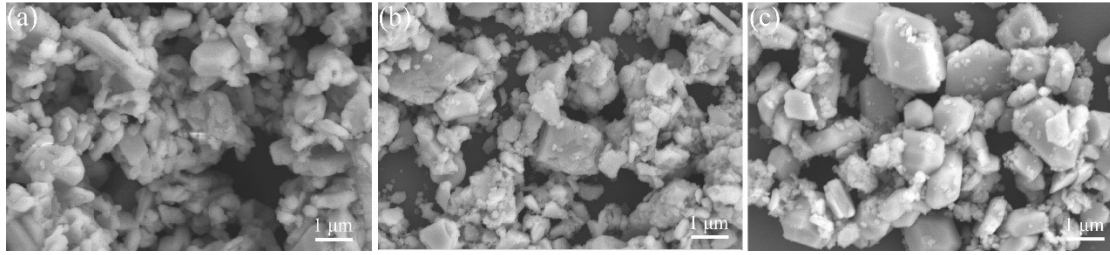

Fig. S2 SEM image of (a)  $\text{Li}_2\text{Mg}_2\text{W}_2\text{O}_9$ , (b)  $\text{Li}_2(\text{Mg}_{0.5}\text{Zn}_{0.5})_2\text{W}_2\text{O}_9$ , and (c)  $\text{Li}_2\text{Zn}_2\text{W}_2\text{O}_9$  samples at the same magnification.

Fig. S2 illustrates the SEM image of the  $\text{Li}_2\text{Mg}_2\text{W}_2\text{O}_9$ ,  $\text{Li}_2(\text{Mg}_{0.5}\text{Zn}_{0.5})_2\text{W}_2\text{O}_9$ , and  $\text{Li}_2\text{Zn}_2\text{W}_2\text{O}_9$  samples at the same magnification. From the images, it can be observed that the particle size of the phosphor gradually increases with  $\text{Zn}^{2+}$  doping content.

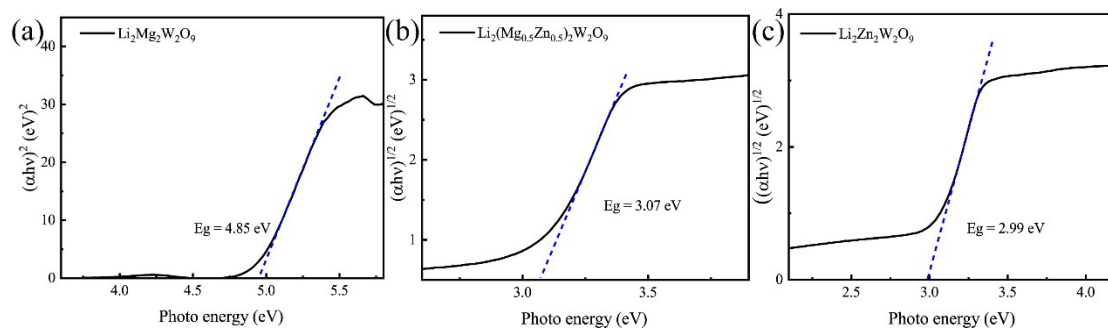

Fig. S3 The Kubelka–Munk spectra for the band gap energy calculation of  $\text{Li}_2\text{M}_2\text{W}_2\text{O}_9$  ( $\text{M} = \text{Mg}, \text{Mg}_{0.5}\text{Zn}_{0.5}, \text{and Zn}$ ).

Fig. S3 illustrates the curve of  $[\alpha h\nu]^n$  versus  $h\nu$ . The calculated  $E_g$  values of the  $\text{Li}_2\text{M}_2\text{W}_2\text{O}_9$  ( $\text{M} = \text{Mg}, \text{Mg}_{0.5}\text{Zn}_{0.5}, \text{and Zn}$ ) phosphor are 4.85 eV, 3.07 eV, and 2.99 eV, respectively.

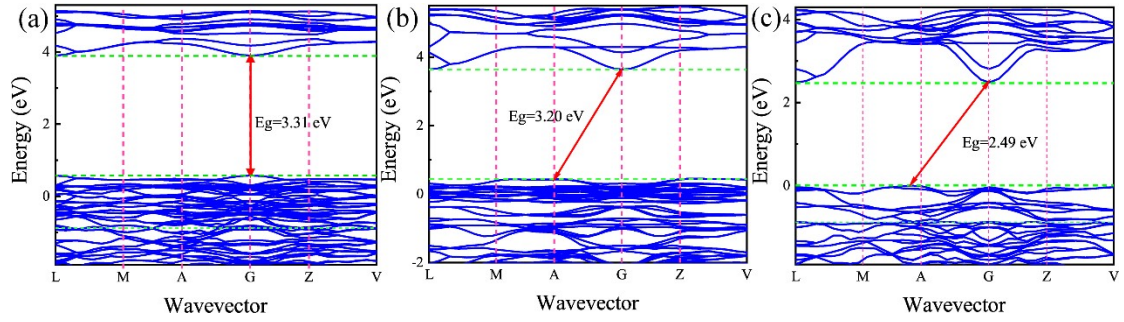

Fig. S4 Calculation of the energy band structure of  $\text{Li}_2\text{M}_2\text{W}_2\text{O}_9$  ( $\text{M} = \text{Mg}$ ,  $\text{Mg}_{0.5}\text{Zn}_{0.5}$ , and  $\text{Zn}$ ).

The energy band structures of the  $\text{Li}_2\text{M}_2\text{W}_2\text{O}_9$  ( $\text{M} = \text{Mg}$ ,  $\text{Mg}_{0.5}\text{Zn}_{0.5}$ , and  $\text{Zn}$ ) matrix were calculated by DFT from the Cambridge Serial Total Energy Package (CASTEP) codes. To improve the accuracy of the calculations, the Perdew–Burke–Ernzerhof (PBE) function of generalized gradient approximation with Hubbard  $U$ -values (GGA +  $U$ ) was used. The theoretical value of  $E_g$  determined by density functional theory calculations are 3.31 eV, 3.20 eV, and 2.49 eV, respectively.

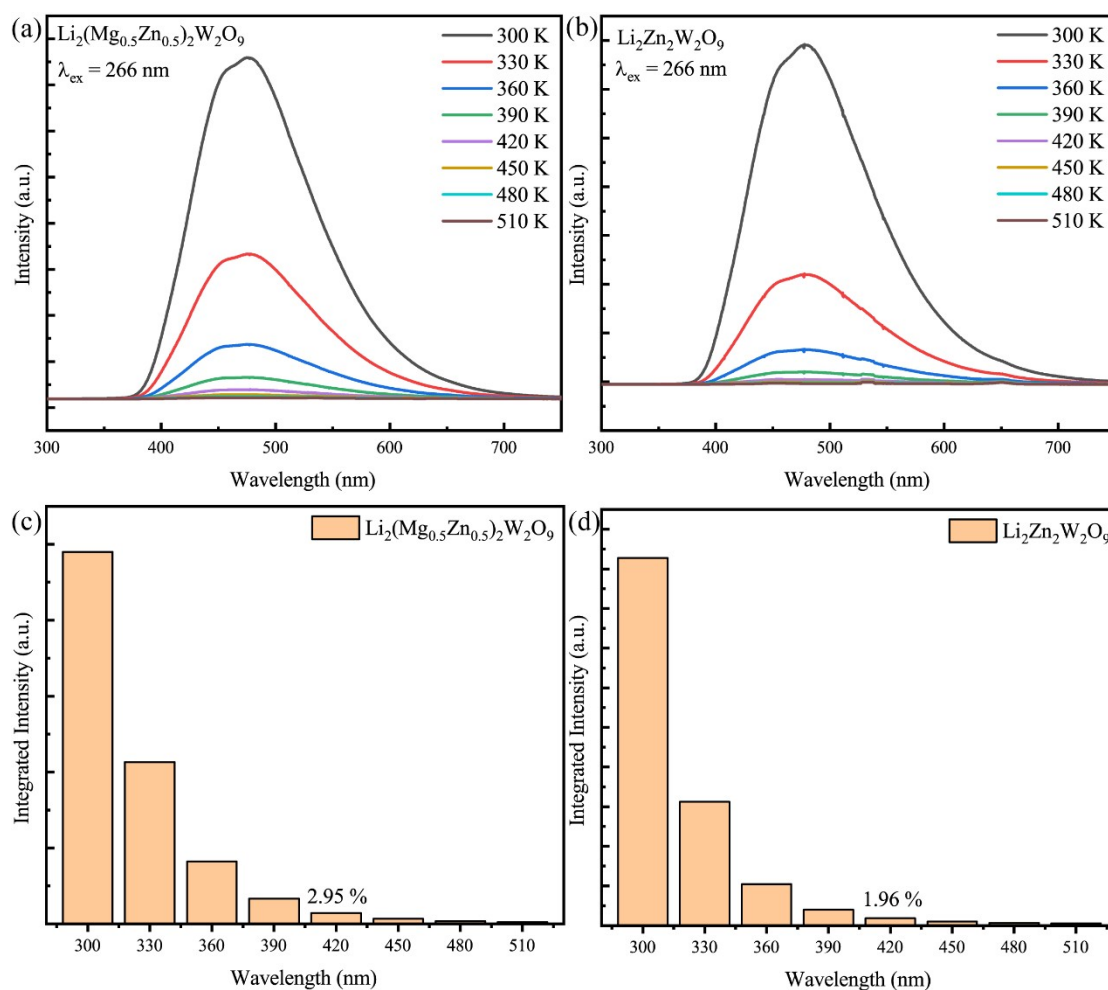

Fig. S5 The PL spectra and histograms with different temperatures of the  $\text{Li}_2(\text{Mg}_{0.5}\text{Zn}_{0.5})_2\text{W}_2\text{O}_9$  and  $\text{Li}_2\text{Zn}_2\text{W}_2\text{O}_9$  phosphors

The thermal dependence of the PL spectra for the  $\text{Li}_2(\text{Mg}_{0.5}\text{Zn}_{0.5})_2\text{W}_2\text{O}_9$  and  $\text{Li}_2\text{Zn}_2\text{W}_2\text{O}_9$  phosphor were measured from 300 to 540 K under excitation at 266 nm. No significant differences in the shape of the PL spectra are observed with increasing temperature, but a substantial decrease in PL intensity is observed for the samples. The integrated intensity histogram in Fig. S5(c, d) visualizes the trend of the PL intensity as a function of temperature. When the temperature was increased to 420 K, the PL intensity of the  $\text{Li}_2(\text{Mg}_{0.5}\text{Zn}_{0.5})_2\text{W}_2\text{O}_9$  and  $\text{Li}_2\text{Zn}_2\text{W}_2\text{O}_9$  samples is only 2.95% and 1.96% of the initial emission intensity at 300 K, respectively.

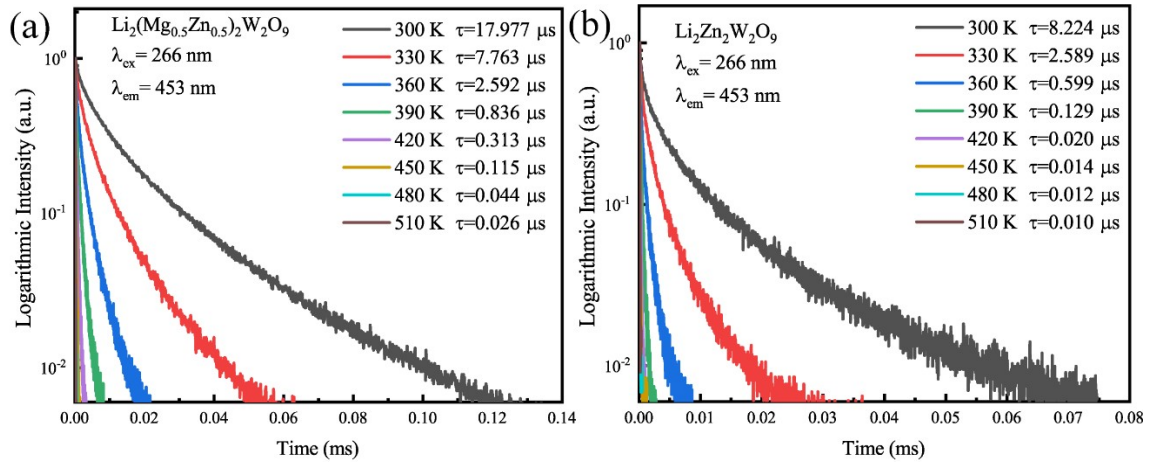

Fig. S6 The decay curves of red emission in  $\text{Li}_2(\text{Mg}_{0.5}\text{Zn}_{0.5})_2\text{W}_2\text{O}_9$  and  $\text{Li}_2\text{Zn}_2\text{W}_2\text{O}_9$  phosphors at different temperatures (300–510 K).

Fig. S6 illustrates the lifetime decay curves of the  $\text{Li}_2(\text{Mg}_{0.5}\text{Zn}_{0.5})_2\text{W}_2\text{O}_9$  and  $\text{Li}_2\text{Zn}_2\text{W}_2\text{O}_9$  samples at different temperatures. The lifetime data of samples are listed in Table S3. It can be observed that the lifetime of the samples gradually decreases as the temperature.

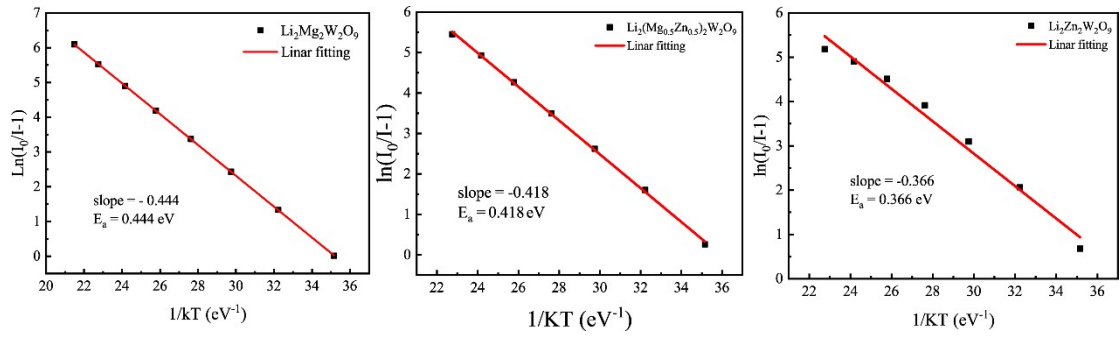

Fig. S7 Relationship between  $\ln(I_0/I-1)$  and  $1/kT$  in  $\text{Li}_2\text{M}_2\text{W}_2\text{O}_9$  (M = Mg,  $\text{Mg}_{0.5}\text{Zn}_{0.5}$ , and Zn) phosphor.

Fig. S7 illustrates the relationship between  $\ln(I_0/I-1)$  and  $1/kT$  in  $\text{Li}_2\text{M}_2\text{W}_2\text{O}_9$  (M = Mg,  $\text{Mg}_{0.5}\text{Zn}_{0.5}$ , and Zn) phosphor. The  $E_a$  corresponds to the slope of the  $\ln[I_0/I(T)^{-1}]$  vs  $[kT]^{-1}$  plot. By calculation, the values of  $E_a$  for the  $\text{Li}_2\text{M}_2\text{W}_2\text{O}_9$  (M = Mg,  $\text{Mg}_{0.5}\text{Zn}_{0.5}$ , and Zn) phosphors are 0.444 eV, 0.418 eV, and 0.366 eV, respectively. The  $E_a$  of the samples decreased with increasing  $\text{Zn}^{2+}$  content.



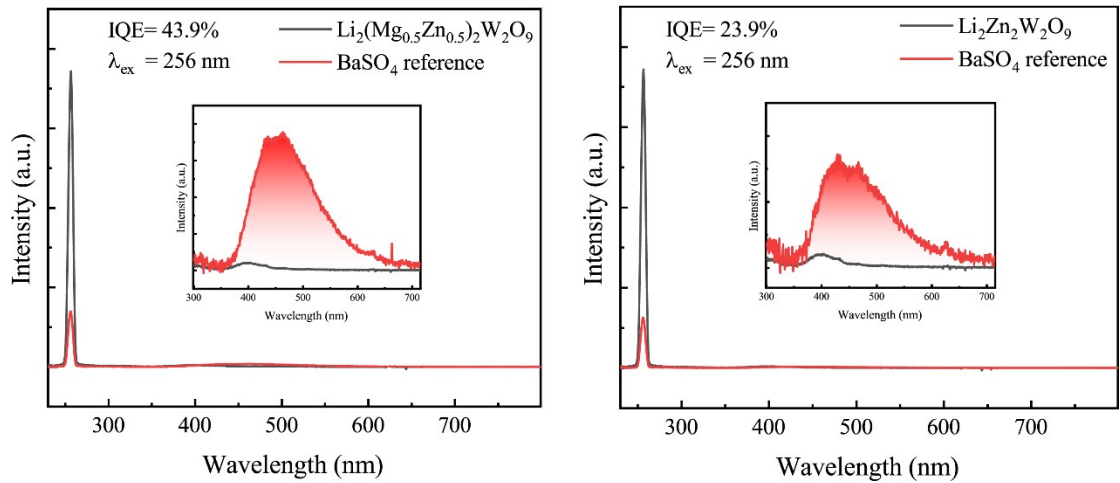

Fig. S8 (a) The IQE map of the  $\text{Li}_2(\text{Mg}_{0.5}\text{Zn}_{0.5})_2\text{W}_2\text{O}_9$  phosphor sample. (b) The IQE map of the  $\text{Li}_2\text{Zn}_2\text{W}_2\text{O}_9$  phosphor sample.

The IQE map of the  $\text{Li}_2(\text{Mg}_{0.5}\text{Zn}_{0.5})_2\text{W}_2\text{O}_9$  and  $\text{Li}_2\text{Zn}_2\text{W}_2\text{O}_9$  phosphor sample is exhibited in Fig. S8. Under 256 nm excitation, the internal quantum efficiencies of samples  $\text{Li}_2(\text{Mg}_{0.5}\text{Zn}_{0.5})_2\text{W}_2\text{O}_9$  and  $\text{Li}_2\text{Zn}_2\text{W}_2\text{O}_9$  are 43.9 % and 23.9 %, respectively.

Table. S1 The lifetime of the  $\text{Li}_2(\text{Mg}_x\text{Zn}_{1-x})_2\text{W}_2\text{O}_9$  ( $x = 0, 0.2, 0.5, 0.8, \text{ and } 1$ ) phosphor.

| Phosphor                                                            | Lifetime ( $\mu\text{s}$ ) |
|---------------------------------------------------------------------|----------------------------|
| $\text{Li}_2\text{Mg}_2\text{W}_2\text{O}_9$                        | 26.29                      |
| $\text{Li}_2(\text{Mg}_{0.8}\text{Zn}_{0.2})_2\text{W}_2\text{O}_9$ | 20.87                      |
| $\text{Li}_2(\text{Mg}_{0.5}\text{Zn}_{0.5})_2\text{W}_2\text{O}_9$ | 18.70                      |
| $\text{Li}_2(\text{Mg}_{0.2}\text{Zn}_{0.8})_2\text{W}_2\text{O}_9$ | 13.06                      |
| $\text{Li}_2\text{Zn}_2\text{W}_2\text{O}_9$                        | 10.33                      |

The lifetime of the  $\text{Li}_2(\text{Mg}_x\text{Zn}_{1-x})_2\text{W}_2\text{O}_9$  ( $x = 0, 0.2, 0.5, 0.8, \text{ and } 1$ ) phosphors is shown in Table S1. The Lifetime of samples decreases gradually with  $\text{Zn}^{2+}$  content.

Table. S2 Peak Wavelength and Energy of the PLE and PL Bands from the Gaussian Deconvolution

| Band | Transition                                                | Li <sub>2</sub> Mg <sub>2</sub> W <sub>2</sub> O <sub>9</sub> |                           |             | Li <sub>2</sub> (Mg <sub>0.5</sub> Zn <sub>0.5</sub> ) <sub>2</sub> W <sub>2</sub> O <sub>9</sub> |                           |             | Li <sub>2</sub> Zn <sub>2</sub> W <sub>2</sub> O <sub>9</sub> |                           |             |
|------|-----------------------------------------------------------|---------------------------------------------------------------|---------------------------|-------------|---------------------------------------------------------------------------------------------------|---------------------------|-------------|---------------------------------------------------------------|---------------------------|-------------|
|      |                                                           | Peak position (nm)                                            | Energy(cm <sup>-1</sup> ) | Energy (eV) | Peak position (nm)                                                                                | Energy(cm <sup>-1</sup> ) | Energy (eV) | Peak position (nm)                                            | Energy(cm <sup>-1</sup> ) | Energy (eV) |
| EX1  | <sup>1</sup> A <sub>1</sub> → <sup>1</sup> T <sub>1</sub> | 249                                                           | 40092                     | 4.97        | 250                                                                                               | 39980                     | 4.96        | 256                                                           | 39002                     | 4.84        |
| EX2  | <sup>1</sup> A <sub>1</sub> → <sup>1</sup> T <sub>2</sub> | 209                                                           | 47942                     | 5.94        | 212                                                                                               | 47260                     | 5.86        | 212                                                           | 47174                     | 5.85        |
| EM1  | <sup>3</sup> T <sub>1</sub> → <sup>1</sup> A <sub>1</sub> | 455                                                           | 21967                     | 2.72        | 470                                                                                               | 21270                     | 2.64        | 474                                                           | 21097                     | 2.62        |
| EM2  | <sup>3</sup> T <sub>2</sub> → <sup>1</sup> A <sub>1</sub> | 425                                                           | 23541                     | 2.92        | 428                                                                                               | 23376                     | 2.90        | 431                                                           | 23219                     | 2.88        |

The PL and PLE spectra of the Li<sub>2</sub>M<sub>2</sub>W<sub>2</sub>O<sub>9</sub> (M = Mg, Mg<sub>0.5</sub>Zn<sub>0.5</sub>, and Zn) phosphors were deconvolved using Gaussian functions to elucidate the detailed optical properties. Table S2 lists the deconvoluted peak positions. The emission and excitation wavelengths of the samples are red-shifted with increasing Zn<sup>2+</sup> content.

Table. S3 The lifetime of the  $\text{Li}_2\text{M}_2\text{W}_2\text{O}_9$  ( $\text{M} = \text{Mg}, \text{Mg}_{0.5}\text{Zn}_{0.5}$ , and  $\text{Zn}$ ) phosphor at different temperatures

| Temperature | Lifetime ( $\mu\text{s}$ )                   |                                                                     |                                              |
|-------------|----------------------------------------------|---------------------------------------------------------------------|----------------------------------------------|
|             | $\text{Li}_2\text{Mg}_2\text{W}_2\text{O}_9$ | $\text{Li}_2(\text{Mg}_{0.5}\text{Zn}_{0.5})_2\text{W}_2\text{O}_9$ | $\text{Li}_2\text{Zn}_2\text{W}_2\text{O}_9$ |
| 300 K       | 30.098                                       | 17.977                                                              | 8.224                                        |
| 330 K       | 15.686                                       | 7.763                                                               | 2.589                                        |
| 360 K       | 6.488                                        | 2.592                                                               | 0.699                                        |
| 390 K       | 2.364                                        | 0.836                                                               | 0.129                                        |
| 420 K       | 0.816                                        | 0.313                                                               | 0.020                                        |
| 450 K       | 0.340                                        | 0.115                                                               | 0.014                                        |
| 480 K       | 0.156                                        | 0.044                                                               | 0.012                                        |
| 510 K       | 0.070                                        | 0.026                                                               | 0.010                                        |

Table. S3 illustrates the lifetime of the  $\text{Li}_2\text{M}_2\text{W}_2\text{O}_9$  ( $\text{M} = \text{Mg}, \text{Mg}_{0.5}\text{Zn}_{0.5}$ , and  $\text{Zn}$ ) phosphor at different temperatures. The luminescence lifetimes of all samples gradually decreased with the temperature. At the same temperature, the samples with more  $\text{Zn}^{2+}$  content have shorter lifetimes.

Table. S4 The calculated CIE coordinates (x, y) of  $\text{Li}_2(\text{Mg}_x\text{Zn}_{1-x})_2\text{W}_2\text{O}_9$  ( $x = 0, 0.2, 0.5, 0.8, \text{ and } 1$ ) phosphor.

| phosphor                                                            | CIE coordinates (x, y) |         |
|---------------------------------------------------------------------|------------------------|---------|
|                                                                     | x                      | y       |
| $\text{Li}_2\text{Mg}_2\text{W}_2\text{O}_9$                        | 0.19693                | 0.251   |
| $\text{Li}_2(\text{Mg}_{0.8}\text{Zn}_{0.2})_2\text{W}_2\text{O}_9$ | 0.2053                 | 0.26598 |
| $\text{Li}_2(\text{Mg}_{0.5}\text{Zn}_{0.5})_2\text{W}_2\text{O}_9$ | 0.21001                | 0.27273 |
| $\text{Li}_2(\text{Mg}_{0.2}\text{Zn}_{0.8})_2\text{W}_2\text{O}_9$ | 0.21577                | 0.28467 |
| $\text{Li}_2\text{Zn}_2\text{W}_2\text{O}_9$                        | 0.22806                | 0.29133 |

The calculated CIE coordinates (x, y) are shown in Table S4. The luminescent color of the phosphor is shifted from the deep blue to the light blue region with the increase of Zn content.
